# Supplementary material for: Synthesis, structure, and properties of palladium(ii) complex of α-formyl pyrrolyl dipyrromethene
Source: Royal Society of Chemistry journal article supplement (doi:10.1039/d2dt00166g), 2022-01-01
Supplement: d2dt00166g1.pdf [file d2dt00166g1.pdf]

## Electronic supplementary information

### Synthesis, Structure, and Properties of Palladium(II) Complex of $\alpha$ -Formyl Pyrrolyl Dipyrromethene

Sabari Panchavarnam, Rima Sengupta, and Mangalampalli Ravikanth\*

Indian Institute of Technology, Powai, Mumbai, 400076, India, Fax:91-22-5723480;

Tel: 91-22-5767176; E-mail: [ravikanth@chem.iitb.ac.in](mailto:ravikanth@chem.iitb.ac.in)

---

### Table of contents

| Sr. no | Details                                                                                               | Page no. |
|--------|-------------------------------------------------------------------------------------------------------|----------|
| 1      | General experimental section                                                                          | S2       |
| 2      | <b>Figures S1-S6.</b> Characterization (HRMS and NMR) data for compounds <b>6</b> and <b>10</b>       | S4-S9    |
| 3      | <b>Tables S1-S6.</b> X-ray crystal data for the compound <b>6</b> and <b>10</b>                       | S10-S15  |
| 4      | <b>Figure S7.</b> Comparison of CV and DPV of compounds <b>6</b> and <b>10</b>                        | S16      |
| 5      | <b>Figure S8.</b> Ground state optimized structures of compounds <b>10</b>                            | S17      |
| 6      | <b>Tables S7.</b> Cartesian coordinates of the optimized (S0) geometries of the compounds <b>10</b> . | S18      |
| 7      | References                                                                                            | S19      |

## General experimental section

### Materials, methods, instrumentation and computational details:

The general chemicals such as 2,3-dichloro-5,6-dicyano-1,4-benzoquinone (DDQ),  $\text{BF}_3 \cdot \text{OEt}_2$ ,  $\text{PdCl}_2$ , benzene-1,2-diamine and Silica (60– 120 mesh) were obtained from Aldrich. Acetonitrile, dichloromethane (HPLC grade) and all other solvents from Merck India, was used for spectroscopic, electrochemical measurements without further purification. The electrochemical measurements were carried out on a Bio-analytical systems epsilon potentiostat connected to C-3 cell stand. Cyclic voltammetric (CV) and Differential pulse voltammetric (DPV) studies were carried out with an electrochemical system utilizing a three-electrode configuration consisting of a glassy-carbon working electrode, platinum-wire auxiliary electrode, and a saturated calomel reference electrode. The experiments were performed in dry  $\text{CH}_2\text{Cl}_2$  using 0.1 M TBAP as the supporting electrolyte. The  $\text{CDCl}_3$  used for NMR studies was purchased from Sigma-Aldrich, USA. The  $^1\text{H}$  and  $^{13}\text{C}$  NMR spectra were recorded on Bruker 400 and 500 MHz instruments. Absorption spectra were recorded with Shimadzu Uv–Vis-NIR spectrophotometer. The HR mass spectra were recorded with a Q-TOF micro mass spectrometer. The Single-crystal X-ray structure analyses were carried out on a Rigaku Saturn724 diffractometer conjugated with a low-temperature attachment. Data were collected at 100 K through graphite monochromated Mo  $\text{K}\alpha$  radiation ( $\lambda = 0.71073 \text{ \AA}$ ) by the  $\omega$ -scan method. The structure was solved by direct method and refined by least-squares against  $F^2$  employing the software packages SHELXL-97,<sup>18</sup> SIR-92,<sup>19</sup> and WINGX.<sup>20</sup> All non-hydrogen atoms were refined anisotropically. CCDC no. 2128295 and 2128296 for compound **6** and **10** contains the supplementary crystallographic data of these compounds. These data can be obtained free of charge from The Cambridge Crystallographic Data Centre via [www.ccdc.cam.ac.uk/data\\_request/cif](http://www.ccdc.cam.ac.uk/data_request/cif).

All DFT calculations were carried out using Gaussian 09 program package. The ground state optimized structures of compounds **10** were generated using the density functional theory (DFT) technique, hybrid functional B3LYP with basis set 6-31G(d,p), and LANL2DZ.<sup>1,2</sup> Functional hybrid set

and identical basis sets were used to obtain the oscillator strengths, and vertical excitation energies were obtained for  $S_0 \rightarrow S_n$  transitions with the help of TD-DFT techniques.<sup>3-7</sup> By making use of the self-consistent reaction field (SCRF), several computations were performed in toluene under the polarizable continuum model PCM.<sup>8-9</sup>

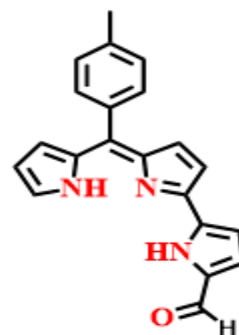

Exact Mass: 327.14  
Molecular Weight: 327.39

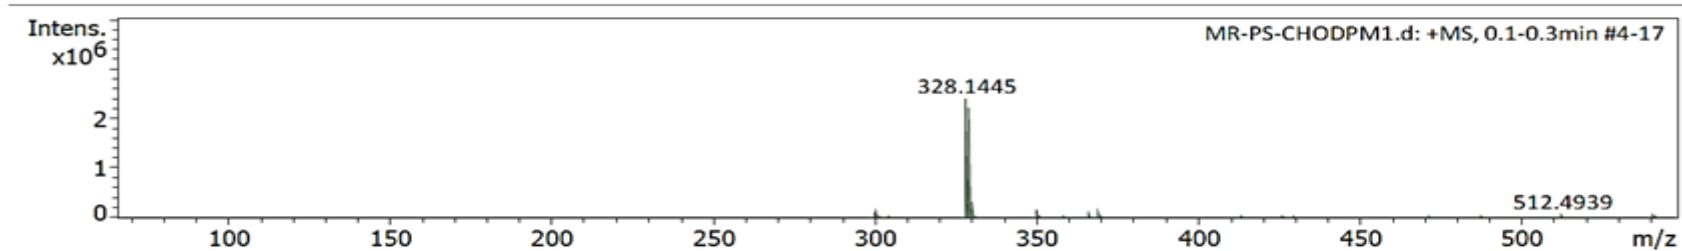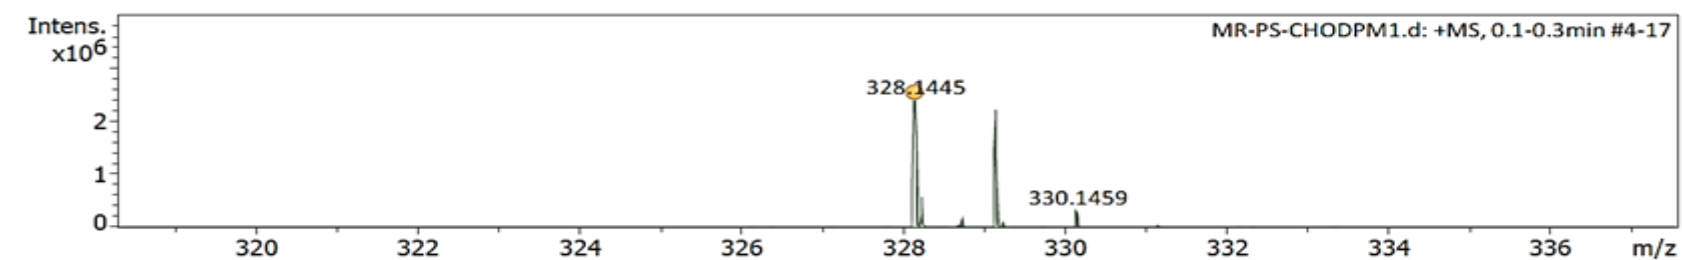

| Meas. m/z | # | Ion Formula                                      | m/z      | err [ppm] | mSigma | # | mSigma | Score  | rdb  | e <sup>-</sup> Conf | N-Rule |
|-----------|---|--------------------------------------------------|----------|-----------|--------|---|--------|--------|------|---------------------|--------|
| 328.1445  | 1 | C <sub>21</sub> H <sub>18</sub> N <sub>3</sub> O | 328.1444 | -0.2      | 398.0  | 1 | 1      | 100.00 | 15.0 | even                | ok     |

Figure S1: HR mass spectrum of compound 6.

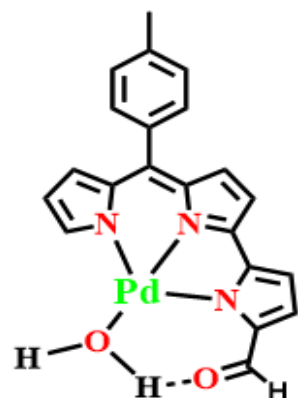

Exact Mass: 449.04  
Molecular Weight: 449.81

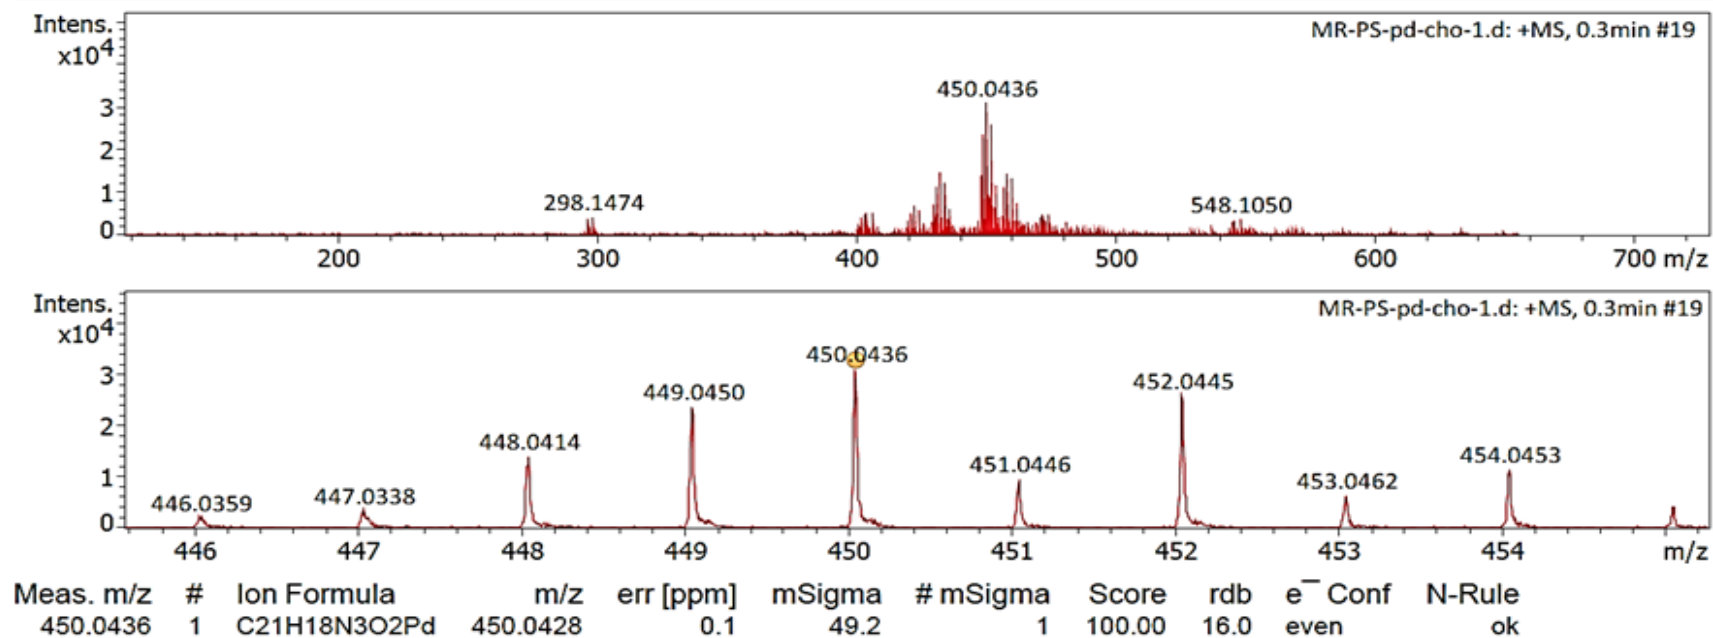

Figure S2: HR Mass spectrum of Compound 10.

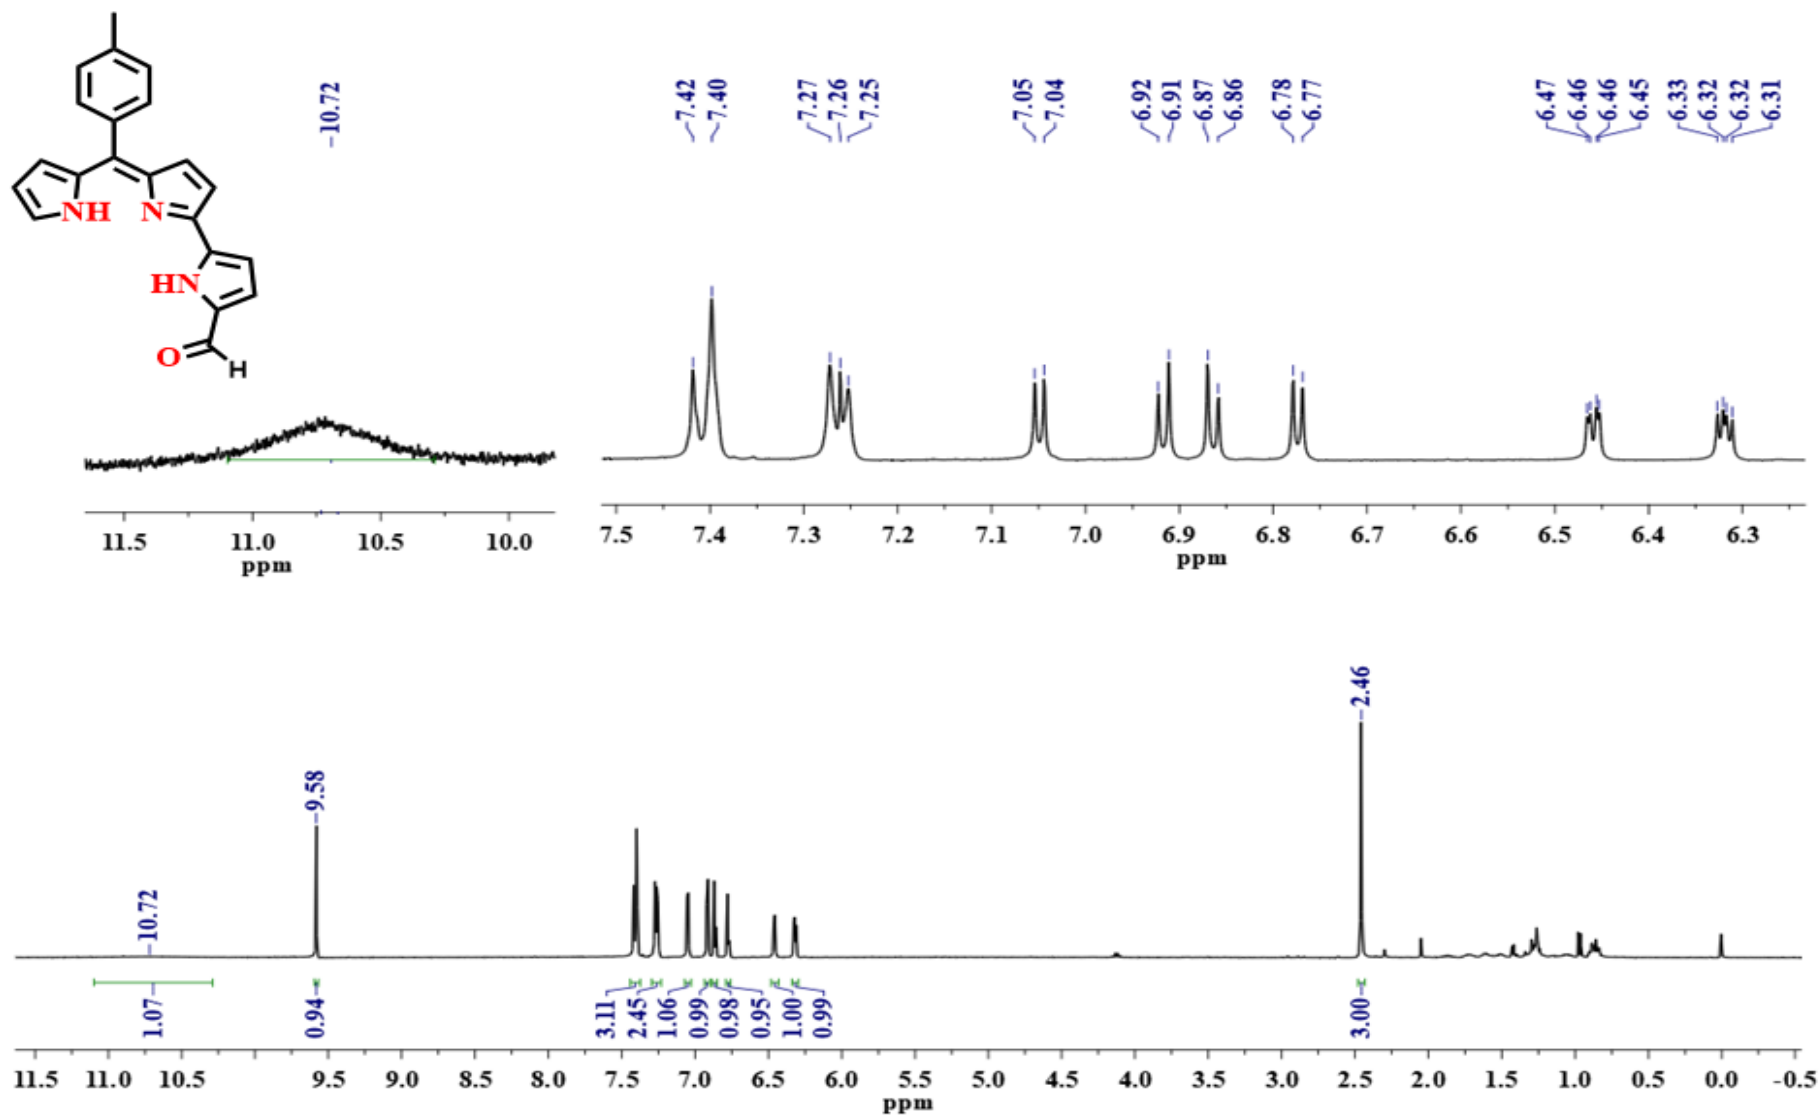

**Figure S3:** <sup>1</sup>H NMR spectrum of compound **9** in CDCl<sub>3</sub> at 25 °C. The inset shows the expansion.

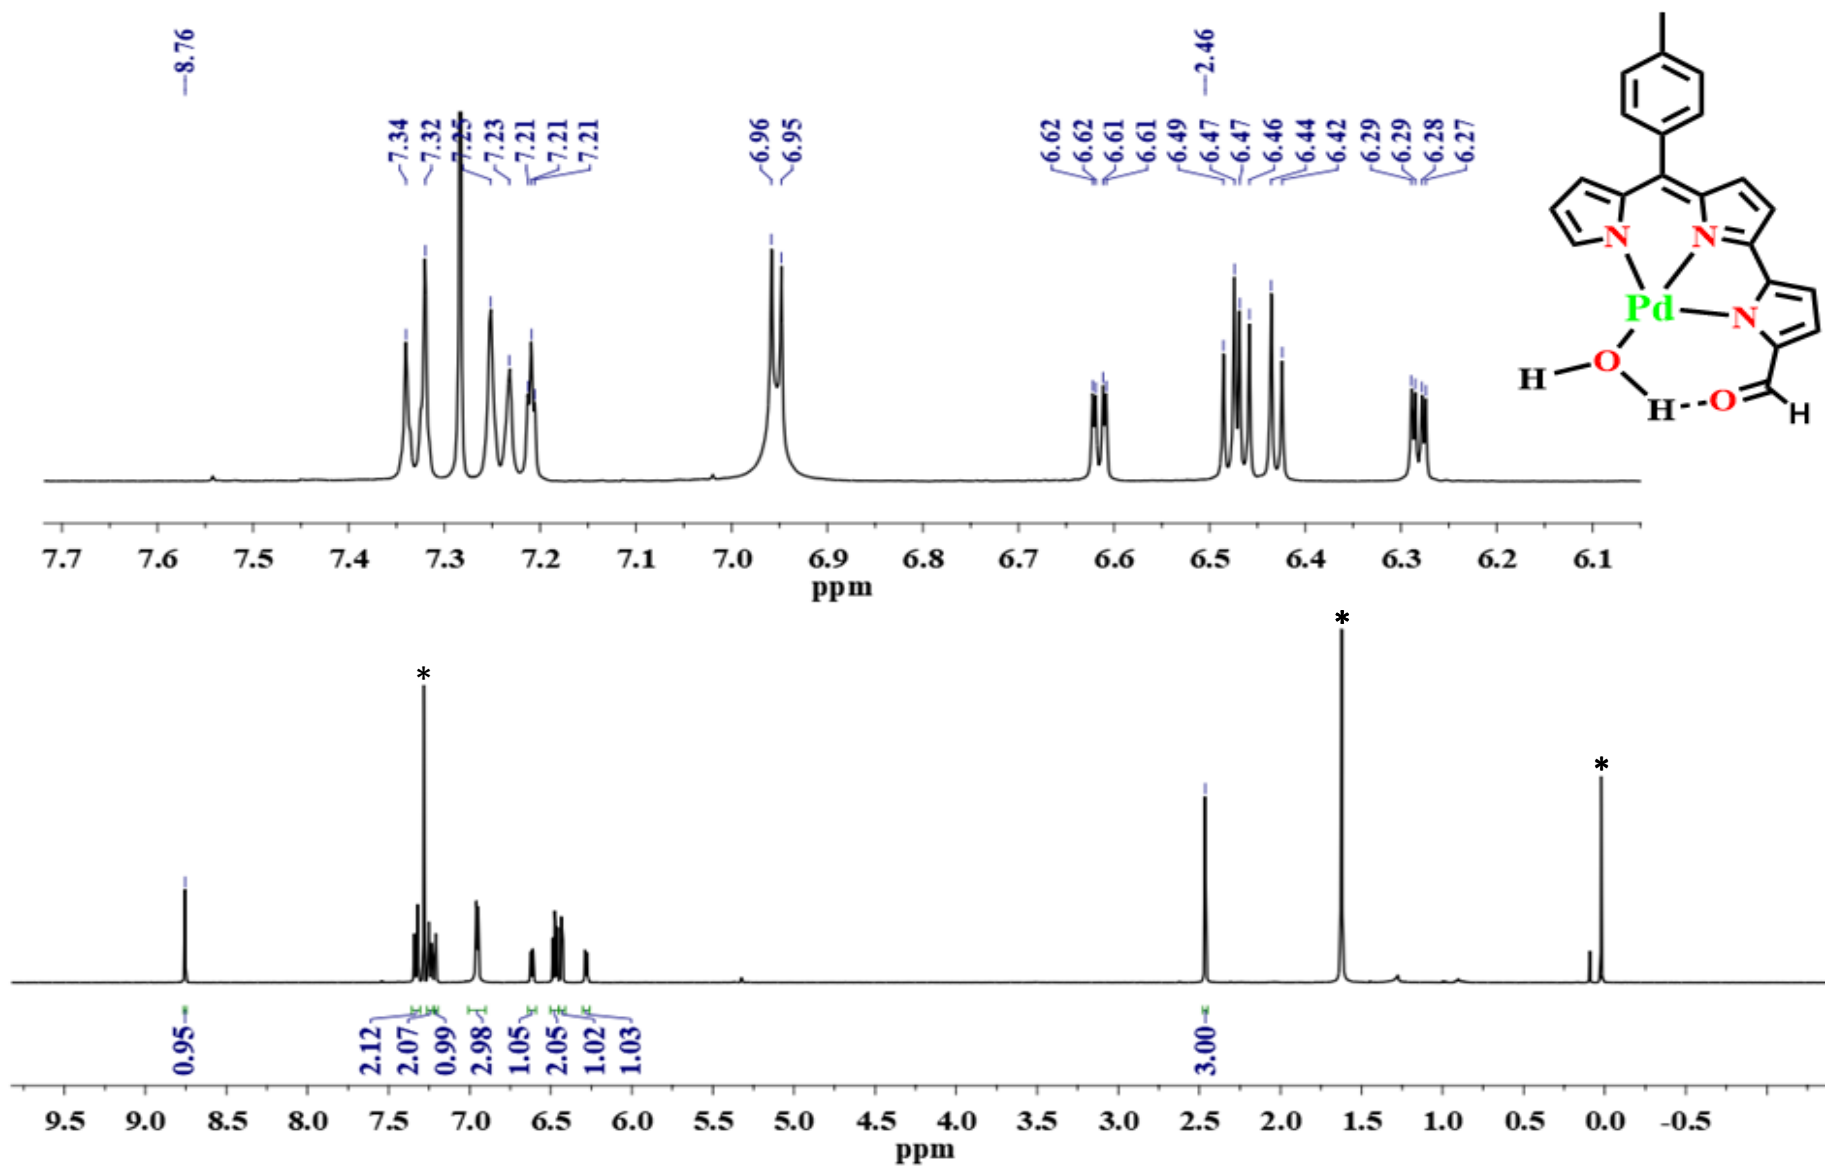

**Figure S4:**  $^1\text{H}$  NMR spectrum of compound **10** in  $\text{CDCl}_3$  at  $25^\circ\text{C}$ . The inset shows the expansion. \*indicates residual solvent peaks.

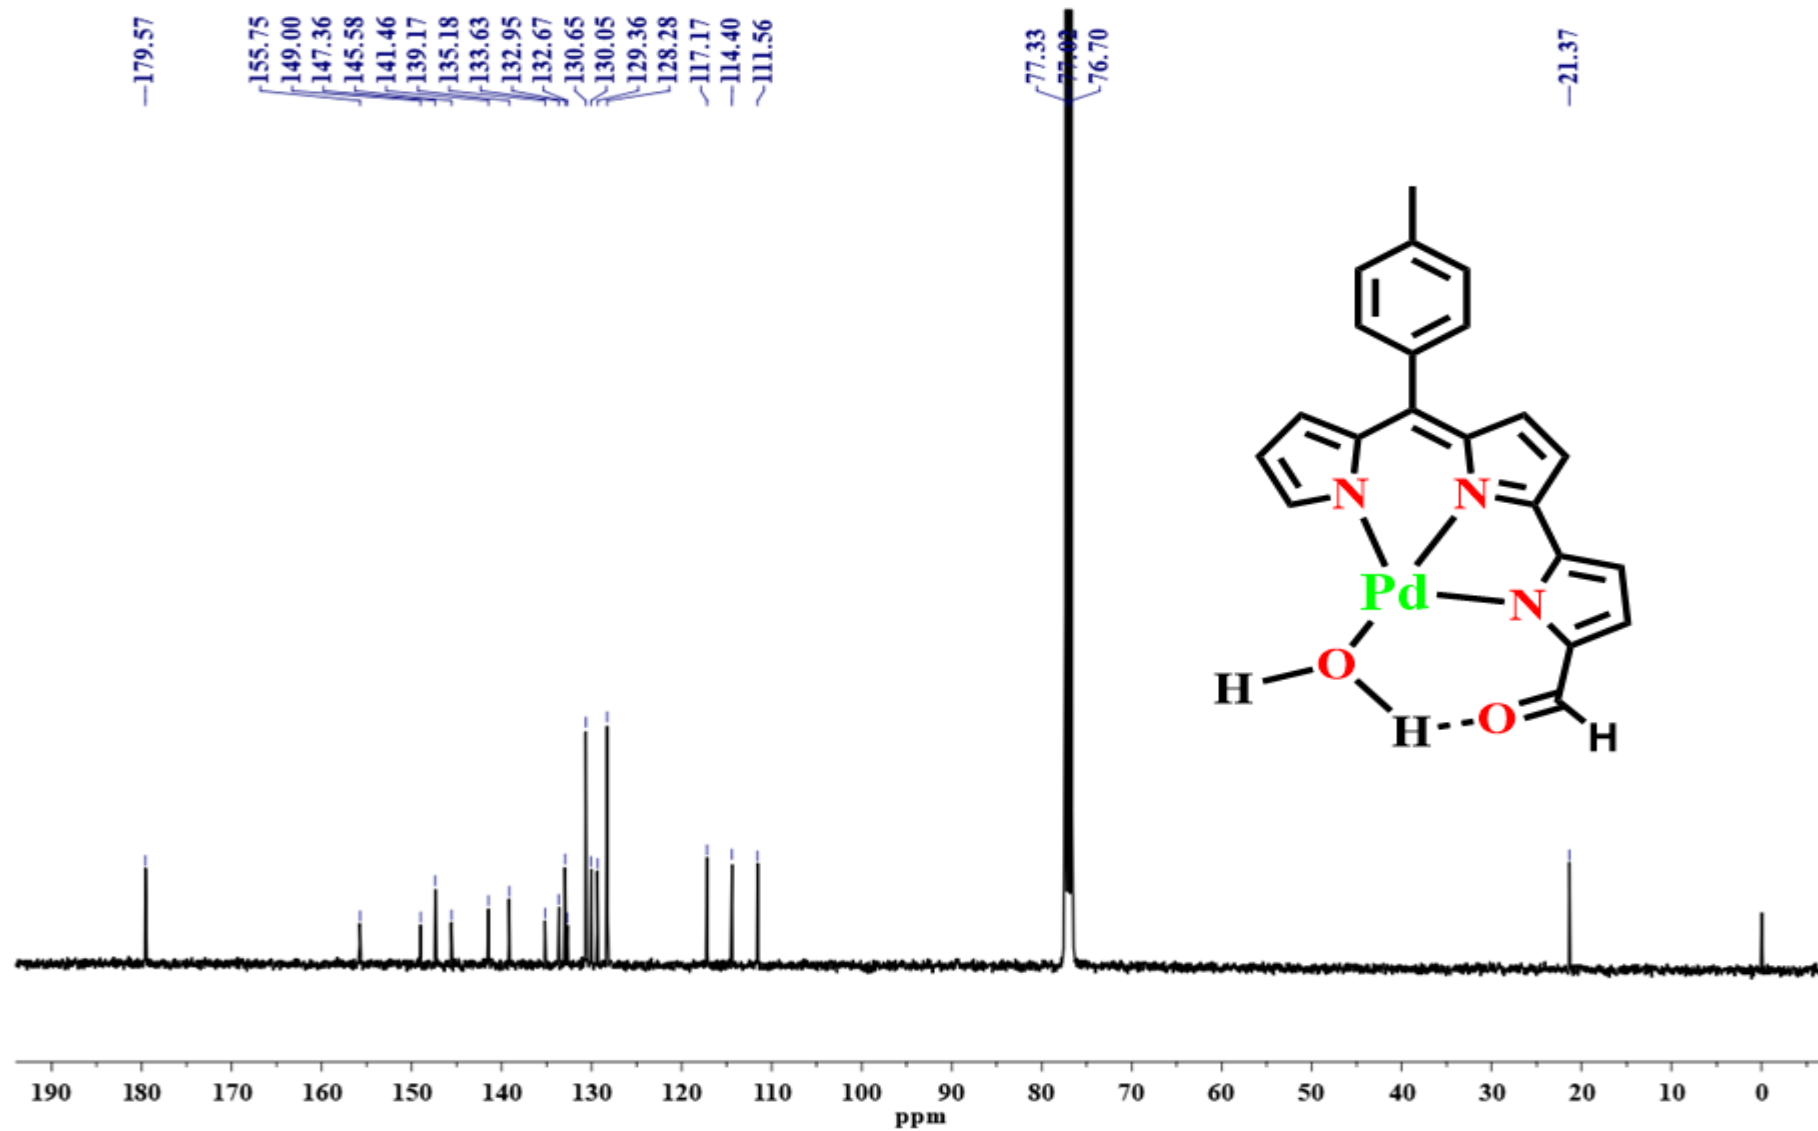

**Figure S5:**  $^{13}\text{C}$  NMR spectrum of compound **10** in  $\text{CDCl}_3$  at  $25^\circ\text{C}$ .



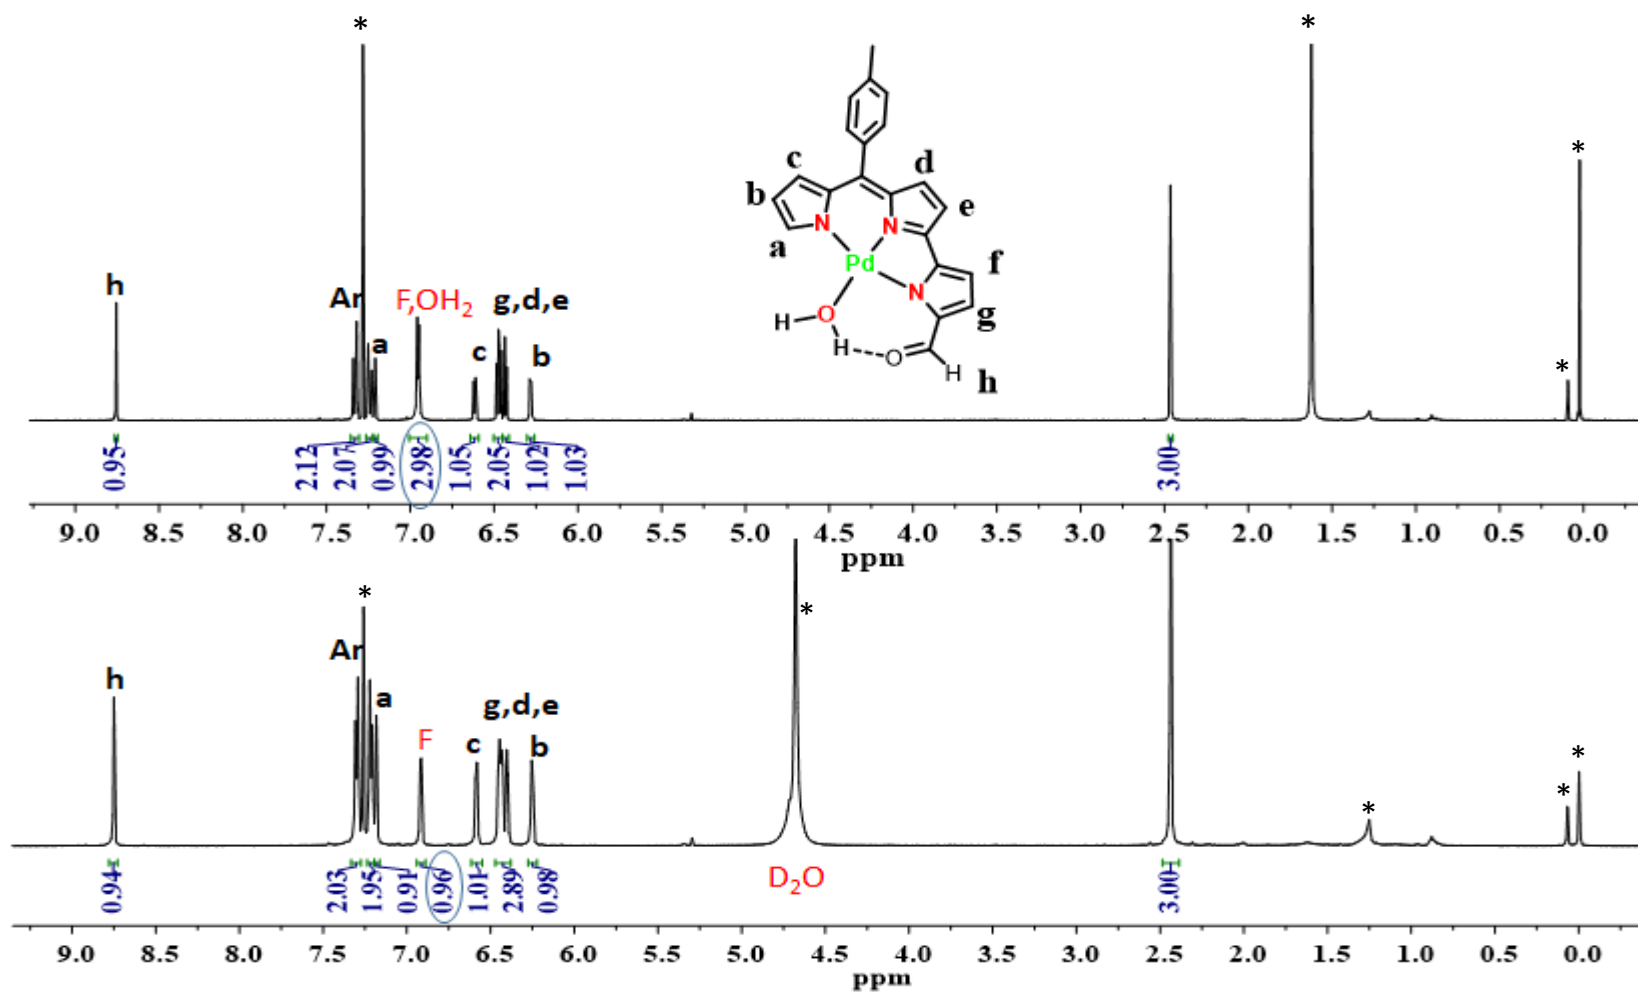

**Figure S6:** Comparison of <sup>1</sup>H NMR spectrum of compound **10** in CDCl<sub>3</sub> at 25 °C and D<sub>2</sub>O experiment of compound **10**. \*indicates residual solvent peaks.

**Table S1 Crystal data and structure refinement for compound 6.**

|                                             |                                                                  |
|---------------------------------------------|------------------------------------------------------------------|
| Empirical formula                           | C <sub>21</sub> H <sub>16</sub> BF <sub>2</sub> N <sub>3</sub> O |
| Formula weight                              | 375.20                                                           |
| Temperature/K                               | 105.15                                                           |
| Crystal system                              | orthorhombic                                                     |
| Space group                                 | Pbca                                                             |
| a/Å                                         | 10.1997(8)                                                       |
| b/Å                                         | 15.3185(11)                                                      |
| c/Å                                         | 22.490(2)                                                        |
| α/°                                         | 90                                                               |
| β/°                                         | 90                                                               |
| γ/°                                         | 90                                                               |
| Volume/Å <sup>3</sup>                       | 3513.9(5)                                                        |
| Z                                           | 8                                                                |
| ρ <sub>calc</sub> /g/cm <sup>3</sup>        | 1.4183                                                           |
| μ/mm <sup>-1</sup>                          | 0.103                                                            |
| F(000)                                      | 1552.8                                                           |
| Crystal size/mm <sup>3</sup>                | 0.154 × 0.121 × 0.091                                            |
| Radiation                                   | Mo Kα (λ = 0.71073)                                              |
| 2θ range for data collection/°              | 5.32 to 50                                                       |
| Index ranges                                | -15 ≤ h ≤ 13, -21 ≤ k ≤ 23, -30 ≤ l ≤ 31                         |
| Reflections collected                       | 33811                                                            |
| Independent reflections                     | 3093 [R <sub>int</sub> = 0.2034, R <sub>sigma</sub> = 0.2269]    |
| Data/restraints/parameters                  | 3093/0/254                                                       |
| Goodness-of-fit on F <sup>2</sup>           | 1.040                                                            |
| Final R indexes [I ≥ 2σ (I)]                | R <sub>1</sub> = 0.0560, wR <sub>2</sub> = 0.1210                |
| Final R indexes [all data]                  | R <sub>1</sub> = 0.0986, wR <sub>2</sub> = 0.1457                |
| Largest diff. peak/hole / e Å <sup>-3</sup> | 0.41/-0.47                                                       |

**Table S2 Bond Lengths for Compound 6.**

| <b>Atom</b> | <b>Atom</b> | <b>Length/Å</b> | <b>Atom</b> | <b>Atom</b> | <b>Length/Å</b> |
|-------------|-------------|-----------------|-------------|-------------|-----------------|
| F1          | B1          | 1.403 (4)       | C6          | C7          | 1.404 (4)       |
| F2          | B1          | 1.388 (4)       | C7          | C8          | 1.369 (4)       |
| O1          | C1          | 1.216 (4)       | C8          | C9          | 1.408 (4)       |
| N1          | C2          | 1.382 (4)       | C9          | C10         | 1.411 (4)       |
| N1          | C5          | 1.358 (4)       | C10         | C11         | 1.409 (4)       |
| N2          | C6          | 1.363 (4)       | C10         | C15         | 1.466 (4)       |
| N2          | C9          | 1.400 (4)       | C11         | C12         | 1.401 (4)       |
| N2          | B1          | 1.551 (4)       | C12         | C13         | 1.377 (4)       |
| N3          | C11         | 1.390 (4)       | C13         | C14         | 1.398 (4)       |
| N3          | C14         | 1.353 (4)       | C15         | C16         | 1.404 (4)       |
| N3          | B1          | 1.533 (4)       | C15         | C20         | 1.405 (4)       |
| C1          | C2          | 1.427 (4)       | C16         | C17         | 1.384 (4)       |
| C2          | C3          | 1.389 (4)       | C17         | C18         | 1.395 (4)       |
| C3          | C4          | 1.381 (4)       | C18         | C19         | 1.388 (4)       |
| C4          | C5          | 1.398 (4)       | C18         | C21         | 1.503 (5)       |
| C5          | C6          | 1.447 (4)       | C19         | C20         | 1.385 (4)       |

**Table S3 Bond Angles for Compound 6.**

| Atom | Atom | Atom | Angle/°  | Atom | Atom | Atom | Angle/°  |
|------|------|------|----------|------|------|------|----------|
| C5   | N1   | C2   | 109.8(2) | C15  | C10  | C9   | 121.1(3) |
| C9   | N2   | C6   | 107.3(2) | C15  | C10  | C11  | 119.7(3) |
| B1   | N2   | C6   | 128.4(3) | C10  | C11  | N3   | 120.7(3) |
| B1   | N2   | C9   | 124.2(2) | C12  | C11  | N3   | 108.1(3) |
| C14  | N3   | C11  | 107.9(2) | C12  | C11  | C10  | 131.2(3) |
| B1   | N3   | C11  | 126.5(2) | C13  | C12  | C11  | 107.3(3) |
| B1   | N3   | C14  | 125.5(3) | C14  | C13  | C12  | 107.6(3) |
| C2   | C1   | O1   | 125.5(3) | C13  | C14  | N3   | 109.2(3) |
| C1   | C2   | N1   | 122.3(3) | C16  | C15  | C10  | 121.8(3) |
| C3   | C2   | N1   | 107.2(3) | C20  | C15  | C10  | 120.6(3) |
| C3   | C2   | C1   | 130.4(3) | C20  | C15  | C16  | 117.6(3) |
| C4   | C3   | C2   | 107.6(3) | C17  | C16  | C15  | 121.1(3) |
| C5   | C4   | C3   | 108.4(3) | C18  | C17  | C16  | 120.9(3) |
| C4   | C5   | N1   | 107.0(3) | C19  | C18  | C17  | 118.3(3) |
| C6   | C5   | N1   | 126.9(3) | C21  | C18  | C17  | 120.3(3) |
| C6   | C5   | C4   | 126.2(3) | C21  | C18  | C19  | 121.4(3) |
| C5   | C6   | N2   | 126.6(3) | C20  | C19  | C18  | 121.3(3) |
| C7   | C6   | N2   | 109.2(3) | C19  | C20  | C15  | 120.8(3) |
| C7   | C6   | C5   | 124.2(3) | F2   | B1   | F1   | 108.4(3) |
| C8   | C7   | C6   | 107.8(3) | N2   | B1   | F1   | 110.3(2) |
| C9   | C8   | C7   | 107.7(3) | N2   | B1   | F2   | 110.5(2) |
| C8   | C9   | N2   | 108.0(2) | N3   | B1   | F1   | 109.5(2) |
| C10  | C9   | N2   | 122.0(3) | N3   | B1   | F2   | 111.0(2) |
| C10  | C9   | C8   | 130.0(3) | N3   | B1   | N2   | 107.1(3) |
| C11  | C10  | C9   | 119.3(3) |      |      |      |          |

**Table S4 Crystal data and structure refinement for Compound 10.**

|                                             |                                                                  |
|---------------------------------------------|------------------------------------------------------------------|
| Empirical formula                           | C <sub>21</sub> H <sub>17</sub> N <sub>3</sub> O <sub>2</sub> Pd |
| Formula weight                              | 449.77                                                           |
| Temperature/K                               | 100(2)                                                           |
| Crystal system                              | orthorhombic                                                     |
| Space group                                 | P2 <sub>1</sub> 2 <sub>1</sub> 2 <sub>1</sub>                    |
| a/Å                                         | 7.2123(4)                                                        |
| b/Å                                         | 8.5123(5)                                                        |
| c/Å                                         | 29.3664(14)                                                      |
| α/°                                         | 90                                                               |
| β/°                                         | 90                                                               |
| γ/°                                         | 90                                                               |
| Volume/Å <sup>3</sup>                       | 1802.90(17)                                                      |
| Z                                           | 4                                                                |
| ρ <sub>calc</sub> /g/cm <sup>3</sup>        | 1.657                                                            |
| μ/mm <sup>-1</sup>                          | 1.051                                                            |
| F(000)                                      | 904.0                                                            |
| Crystal size/mm <sup>3</sup>                | 0.11 × 0.09 × 0.07                                               |
| Radiation                                   | MoKα (λ = 0.71073)                                               |
| 2θ range for data collection/°              | 4.982 to 50.048                                                  |
| Index ranges                                | -8 ≤ h ≤ 8, -9 ≤ k ≤ 10, -34 ≤ l ≤ 34                            |
| Reflections collected                       | 10282                                                            |
| Independent reflections                     | 3171 [R <sub>int</sub> = 0.0698, R <sub>sigma</sub> = 0.0722]    |
| Data/restraints/parameters                  | 3171/303/236                                                     |
| Goodness-of-fit on F <sup>2</sup>           | 1.129                                                            |
| Final R indexes [I ≥ 2σ (I)]                | R <sub>1</sub> = 0.0910, wR <sub>2</sub> = 0.2385                |
| Final R indexes [all data]                  | R <sub>1</sub> = 0.0972, wR <sub>2</sub> = 0.2450                |
| Largest diff. peak/hole / e Å <sup>-3</sup> | 2.00/-1.13                                                       |
| Flack parameter                             | 0.01(4)                                                          |

**Table S5 Bond Lengths for Compound 10.**

| Atom | Atom | Length/Å   | Atom | Atom | Length/Å |
|------|------|------------|------|------|----------|
| Pd1  | O2   | 2.058 (15) | C7   | C6   | 1.43 (3) |
| Pd1  | N1   | 2.047 (14) | C7   | C8   | 1.41 (3) |
| Pd1  | N2   | 1.924 (19) | C8   | C9   | 1.41 (4) |
| Pd1  | N3   | 1.998 (18) | C9   | C10  | 1.37 (3) |
| O1   | C1   | 1.23 (2)   | C11  | C10  | 1.34 (4) |
| N1   | C2   | 1.37 (2)   | C11  | C12  | 1.49 (4) |
| N1   | C5   | 1.35 (2)   | C12  | C13  | 1.32 (4) |
| N2   | C6   | 1.36 (3)   | C14  | C13  | 1.33 (4) |
| N2   | C9   | 1.38 (3)   | C15  | C10  | 1.55 (3) |
| N3   | C11  | 1.44 (3)   | C15  | C16  | 1.3900   |
| N3   | C14  | 1.37 (3)   | C15  | C20  | 1.3900   |
| C2   | C1   | 1.42 (3)   | C17  | C16  | 1.3900   |
| C2   | C3   | 1.40 (3)   | C18  | C17  | 1.3900   |
| C3   | C4   | 1.39 (3)   | C18  | C21  | 1.61 (4) |
| C5   | C4   | 1.37 (3)   | C19  | C18  | 1.3900   |
| C5   | C6   | 1.45 (3)   | C20  | C19  | 1.3900   |

**Table S6 Bond Angles for Compound 10.**

| Atom | Atom | Atom | Angle/°    | Atom | Atom | Atom | Angle/°    |
|------|------|------|------------|------|------|------|------------|
| N1   | Pd1  | O2   | 97.5 (6)   | C7   | C6   | C5   | 135 (2)    |
| N2   | Pd1  | O2   | 177.7 (6)  | C8   | C7   | C6   | 105 (2)    |
| N2   | Pd1  | N1   | 80.8 (7)   | C7   | C8   | C9   | 109 (2)    |
| N2   | Pd1  | N3   | 88.3 (8)   | N2   | C9   | C8   | 107 (2)    |
| N3   | Pd1  | O2   | 93.4 (7)   | C10  | C9   | N2   | 122 (2)    |
| N3   | Pd1  | N1   | 169.1 (8)  | C10  | C9   | C8   | 131 (2)    |
| C2   | N1   | Pd1  | 140.9 (12) | C9   | C10  | C15  | 108 (2)    |
| C5   | N1   | Pd1  | 114.1 (11) | C11  | C10  | C9   | 122 (2)    |
| C5   | N1   | C2   | 105.1 (15) | C11  | C10  | C15  | 130 (2)    |
| C6   | N2   | Pd1  | 115.8 (13) | N3   | C11  | C12  | 100 (3)    |
| C6   | N2   | C9   | 110.1 (19) | C10  | C11  | N3   | 130 (2)    |
| C9   | N2   | Pd1  | 134.0 (17) | C10  | C11  | C12  | 130 (2)    |
| C11  | N3   | Pd1  | 122.9 (17) | C13  | C12  | C11  | 112 (3)    |
| C14  | N3   | Pd1  | 129.9 (18) | C12  | C13  | C14  | 107 (3)    |
| C14  | N3   | C11  | 107 (2)    | C13  | C14  | N3   | 113 (3)    |
| O1   | C1   | C2   | 130.5 (17) | C16  | C15  | C10  | 127.0 (15) |
| N1   | C2   | C1   | 126.9 (16) | C20  | C15  | C10  | 112.4 (16) |
| N1   | C2   | C3   | 110.0 (16) | C20  | C15  | C16  | 120.0      |
| C3   | C2   | C1   | 123.1 (17) | C17  | C16  | C15  | 120.0      |
| C4   | C3   | C2   | 106.4 (18) | C18  | C17  | C16  | 120.0      |
| C5   | C4   | C3   | 105.6 (18) | C17  | C18  | C19  | 120.0      |
| N1   | C5   | C4   | 112.7 (17) | C17  | C18  | C21  | 123.4 (19) |
| N1   | C5   | C6   | 113.0 (17) | C19  | C18  | C21  | 114 (2)    |
| C4   | C5   | C6   | 134.2 (18) | C18  | C19  | C20  | 120.0      |
| N2   | C6   | C5   | 116.2 (18) | C15  | C20  | C19  | 120.0      |
| N2   | C6   | C7   | 108.8 (19) |      |      |      |            |

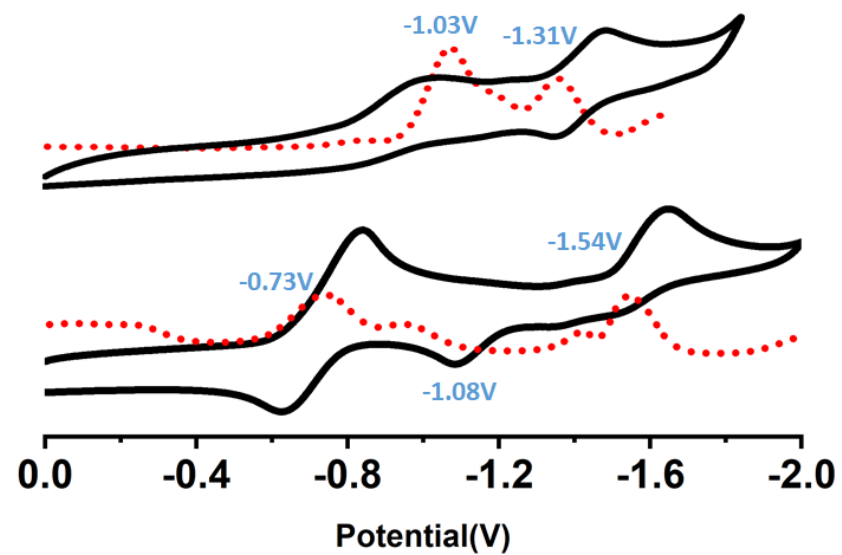

**Figure S7.** Comparison of cyclic voltammograms (CV) and differential pulse voltammograms (DPV) of the compounds **6** and **10** recorded in  $\text{CH}_2\text{Cl}_2$  containing 0.1 M TBAP as supporting electrolyte recorded at 50 mV/s scan speed.



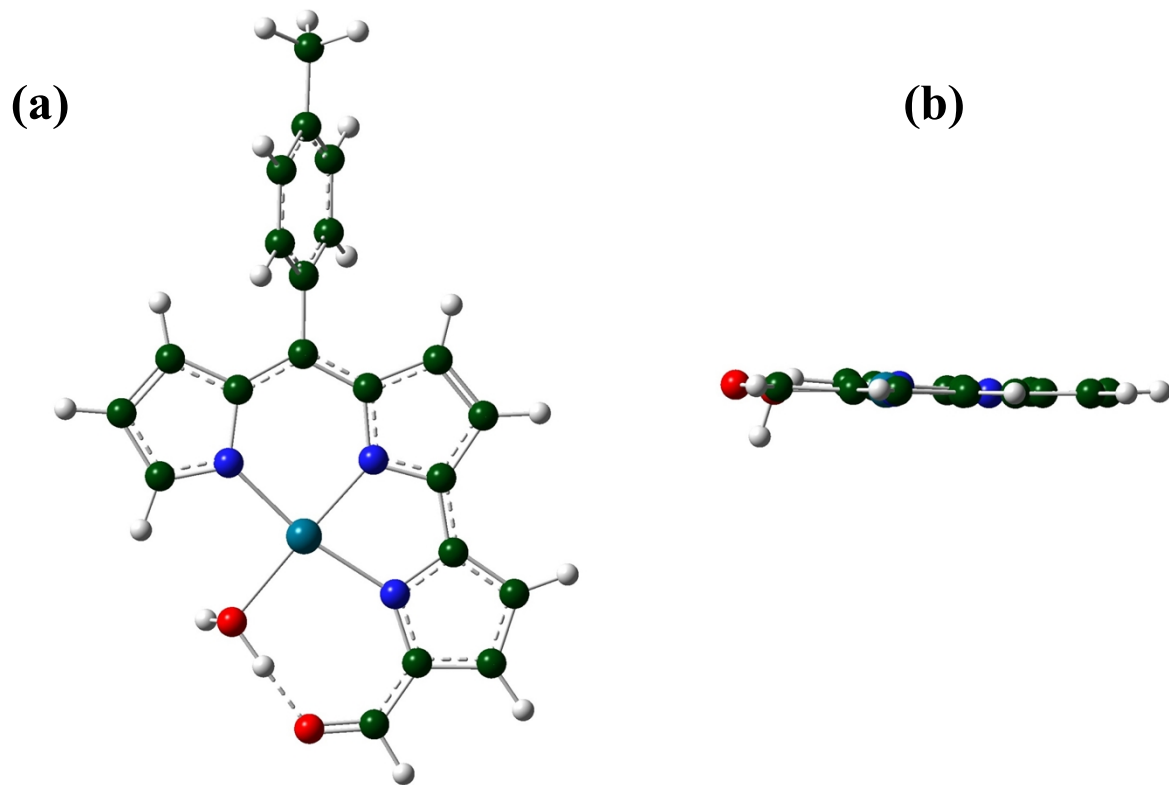

**Figure S8.** DFT optimized structure of compound **10**. (a) top view, (b) side view.

**Table S7.**  $S_0$  optimized geometry of the compound **10** at B3LYP/6-31g (d,p) level of theory

# Sum of imaginary frequencies= 0

| Atom | X        | Y        | Z        | Atom | X        | Y        | Z        |
|------|----------|----------|----------|------|----------|----------|----------|
| Pd   | 1.624029 | 0.678673 | 0.027492 | C    | -1.80227 | 0.12141  | 0.017804 |
| O    | 2.989788 | 2.300946 | 0.118011 | C    | -1.3565  | 1.462885 | 0.047916 |
| H    | 3.919895 | 1.86523  | 0.014852 | C    | -2.16939 | 2.637664 | 0.120684 |
| H    | 2.972366 | 2.643712 | 1.022484 | H    | -3.24714 | 2.643766 | 0.186692 |
| O    | 5.249906 | 1.200046 | -0.02604 | C    | -1.32441 | 3.733765 | 0.099522 |
| N    | 3.026547 | -0.85471 | -0.01433 | H    | -1.59628 | 4.779612 | 0.133816 |
| N    | 0.429137 | -0.87489 | 0.000117 | C    | -0.01046 | 3.217714 | 0.027878 |
| N    | -0.02232 | 1.877929 | 0.008328 | H    | 0.926013 | 3.757305 | -0.02047 |
| C    | 5.392443 | -0.04146 | -0.05218 | C    | -3.26904 | -0.14029 | 0.009405 |
| H    | 6.423361 | -0.4341  | -0.08307 | C    | -3.86615 | -0.91406 | 1.017219 |
| C    | 4.390494 | -1.05021 | -0.05193 | H    | -3.25239 | -1.30395 | 1.823241 |
| C    | 4.653399 | -2.44505 | -0.111   | C    | -5.23796 | -1.16088 | 1.006888 |
| H    | 5.637927 | -2.89319 | -0.14854 | H    | -5.67848 | -1.74941 | 1.807879 |
| C    | 3.428664 | -3.09914 | -0.11561 | C    | -6.05875 | -0.65977 | -0.01171 |
| H    | 3.247858 | -4.16428 | -0.15883 | C    | -5.4584  | 0.109463 | -1.01813 |
| C    | 2.443367 | -2.08657 | -0.05804 | H    | -6.07074 | 0.509565 | -1.82261 |
| C    | 1.001753 | -2.09398 | -0.05419 | C    | -4.09007 | 0.369707 | -1.00982 |
| C    | -0.02495 | -3.07807 | -0.11398 | H    | -3.64632 | 0.960946 | -1.80455 |
| H    | 0.121594 | -4.14756 | -0.17164 | C    | -7.53856 | -0.95884 | -0.04093 |
| C    | -1.2301  | -2.3955  | -0.09898 | H    | -7.75176 | -1.83535 | -0.66566 |
| H    | -2.22034 | -2.82411 | -0.14723 | H    | -8.1084  | -0.12114 | -0.45459 |
| C    | -0.9413  | -0.99235 | -0.01606 | H    | -7.92441 | -1.17091 | 0.960375 |

## References

- (1) Treutler, O.; Ahlrichs, R. Efficient molecular numerical integration schemes. *J. Chem. Phys.* **1995**, *102*, 346–354.
- (2) Becke, A. D. A new mixing of Hartree–Fock and local density-functional theories. *J. Chem. Phys.* **1993**, *98* 1372–1377.
- (3) Hehre, W. J. Ab initio molecular orbital theory. *Acc. Chem. Res.* **1976**, *9*, 399–406.
- (4) Bauernschmitt, R.; Ahlrichs, R. Treatment of electronic excitations within the adiabatic approximation of time dependent density functional theory. *Chem. Phys. Lett.* **1996**, *256*, 454–464.
- (5) Gabe, Y.; Ueno, T.; Urano, Y.; Kojima, H.; Nagano, T. Tunable design strategy for fluorescence probes based on 4-substituted BODIPY chromophore: improvement of highly sensitive fluorescence probe for nitric oxide. *Anal. Bioanal. Chem.* **2006**, *386*, 621–626.
- (6) Furche, F.; Ahlrichs, R. Adiabatic time-dependent density functional methods for excited state properties. *J. Chem. Phys.* **2002**, *117*, 7433–7447.
- (7) Scalmani, G.; Frisch, M. J.; Mennucci, B.; Tomasi, J.; Cammi, R.; Barone, V. Geometries and properties of excited states in the gas phase and in solution: Theory and application of a time-dependent density functional theory polarizable continuum model. *J. Chem. Phys.* **2006**, *124*, 94107–94115.
- (8) Cossi, M.; Barone, V.; Cammi, R.; Tomasi, Ab initio study of solvated molecules: a new implementation of the polarizable continuum model. *J. Chem. Phys. Lett.* **1996**, *255*, 327–335.
- (9) Tomasi, J.; Mennucci, B.; Cammi, R. Quantum Mechanical Continuum Solvation Models. *Chem. Rev.* **2005**, *105*, 2999–3094.
